# Supplementary material for: Food Parenting Practices Among Parents with Overweight and Obesity: A Systematic Review
Source: Preprints.org preprint supplement (doi:10.20944/preprints201811.0397.v1), 2018-11-16
Supplement: Supplementary file 2 [file supplementary]

Archive with 2 entries (2 files):
- S1 -Table 1 - Study Results Table.pdf
- S2 - PRISMA checklist.pdf
