# Supplementary material for: Food Parenting Practices Among Parents with Overweight and Obesity: A Systematic Review
Source: Preprints.org preprint supplement (doi:10.20944/preprints201811.0397.v1), 2018-11-16
Supplement: Supplementary file 2 [file supplementary › S1 -Table 1 - Study Results Table.pdf]

**Table 1: Study Results Table**

| Author (year), Study country              | Design          | Aim(s)                                                              | Sample      | BMI       | N   | Age of Children         | FPP Measures | Relevant FPP Findings                                                                                                                                                                                                                                                                                                                                                                                                                                                                                                                                                                                                                                                                                                                                    | Relevant Conclusions                                                          | Quality Rating |
|-------------------------------------------|-----------------|---------------------------------------------------------------------|-------------|-----------|-----|-------------------------|--------------|----------------------------------------------------------------------------------------------------------------------------------------------------------------------------------------------------------------------------------------------------------------------------------------------------------------------------------------------------------------------------------------------------------------------------------------------------------------------------------------------------------------------------------------------------------------------------------------------------------------------------------------------------------------------------------------------------------------------------------------------------------|-------------------------------------------------------------------------------|----------------|
| Baughcum et al (2001) <sup>67</sup> , USA | Cross-sectional | To develop and analyse the Pre-schooler Feeding Questionnaire (PFQ) | 634 mothers | 18.5-29.9 | 488 | 23 months – 5 year olds | PFQ          | Significantly higher degree of age-inappropriate feeding ( $p = .004$ ) (no longer true after adjusting for family income), concern about child overeating or being overweight ( $p = .001$ ) regardless of child overweight and family income. Significantly lower degree of structure during feeding interactions ( $p = .001$ ) (no longer true after adjusting for family income) among mothers with obesity vs mothers without obesity. No significant differences on child's control of feeding interactions ( $p = .070$ ), using food to calm the child, concern about the child being underweight, difficulty in child feeding and pushing the child to eat more (p values not reported) among mothers with obesity vs mothers without obesity. | There is no specific feeding style associated with overweight young children. | +              |
|                                           |                 |                                                                     |             | ≥30       | 146 |                         |              |                                                                                                                                                                                                                                                                                                                                                                                                                                                                                                                                                                                                                                                                                                                                                          |                                                                               |                |

| Author (year), Study country       | Design          | Aim(s)                                                                                                           | Sample       | BMI     | N    | Age of Children                       | FPP Measures                                   | Relevant FPP Findings                                                                                                                                                                                                                                                                                                                                                                                    | Relevant Conclusions                                                                                                 | Quality Rating |
|------------------------------------|-----------------|------------------------------------------------------------------------------------------------------------------|--------------|---------|------|---------------------------------------|------------------------------------------------|----------------------------------------------------------------------------------------------------------------------------------------------------------------------------------------------------------------------------------------------------------------------------------------------------------------------------------------------------------------------------------------------------------|----------------------------------------------------------------------------------------------------------------------|----------------|
| Berge et al (2015) [79], USA       | Cross-sectional | To explore food restriction and pressure to eat FPPs by parent and adolescent weight concordance and discordance | 3252 parents | ≤25     | 1444 | Adolescents (mean age 14.4 years old) | CFQ subscales: Pressure to eat and Restriction | Parents with healthy-weight reported significantly higher levels of pressure to eat, compared to parents with overweight and obesity ( $p < .05$ ). Parents with overweight/obesity reported significantly more food restriction compared to parent with healthy-weight ( $p < .05$ ).                                                                                                                   | Results suggest that use of FPPs are as a result of parents' own weight status and their adolescents' weight status. | ++             |
|                                    |                 |                                                                                                                  |              | ≥25     | 2108 |                                       |                                                |                                                                                                                                                                                                                                                                                                                                                                                                          |                                                                                                                      |                |
| Cebeci & Guven (2014) [70], Turkey | Cross-sectional | To examine the influence of maternal obesity on child-feeding practices with their children with obesity.        | 491 mothers  | 18-24.9 | 41   | 6 – 18.5 year olds                    | Turkish CFQ                                    | Other than perceived parent weight ( $p < .001$ ), there were no significant differences in any CFQ subscales (concern over perceived responsibility ( $p = .494$ ), perceived child weight ( $p = .093$ ), concern over child's weight ( $p = .152$ ), restriction ( $p = .234$ ), pressure to eat ( $p = .072$ ) and monitoring ( $p = .782$ )) among mothers with obesity vs mothers without obesity. | Maternal BMI does not appear to have a significant influence on child-feeding practices.                             | +              |
|                                    |                 |                                                                                                                  |              | 25-29.9 | 134  |                                       |                                                |                                                                                                                                                                                                                                                                                                                                                                                                          |                                                                                                                      |                |
|                                    |                 |                                                                                                                  |              | ≥30     | 316  |                                       |                                                |                                                                                                                                                                                                                                                                                                                                                                                                          |                                                                                                                      |                |

| Author (year), Study country         | Design          | Aim(s)                                                                                     | Sample                | BMI          | N   | Age of Children | FPP Measures                                                         | Relevant FPP Findings                                                                                                                                                                                                                                                                                                                                             | Relevant Conclusions                                                                                        | Quality Rating |
|--------------------------------------|-----------------|--------------------------------------------------------------------------------------------|-----------------------|--------------|-----|-----------------|----------------------------------------------------------------------|-------------------------------------------------------------------------------------------------------------------------------------------------------------------------------------------------------------------------------------------------------------------------------------------------------------------------------------------------------------------|-------------------------------------------------------------------------------------------------------------|----------------|
| Corsini et al (2010) [71], Australia | Cross-sectional | To develop and preliminarily validate the Toddler Snack Food Feeding Questionnaire (TSFFQ) | Sample 2: 216 mothers | ≤18.5        | 2   | 4 – 5 year olds | TFSSQ and CFQ subscales: Restriction, Pressure to Eat and Monitoring | <i>Sample 2 (pre-schoolers, past practices)</i><br>Mothers without obesity allowed access to snack foods significantly less ( $p = .001$ ), and implemented rules around snacking (approaching statistical significance, $p = .022$ ) compared to mothers with obesity. No significant differences were found on any other constructs ( $p$ values not reported). | The TSFFQ is a useful measure that could be used in addition to other measures of parental feeding control. | –              |
|                                      |                 |                                                                                            |                       | 18.5-24.9    | 120 |                 |                                                                      |                                                                                                                                                                                                                                                                                                                                                                   |                                                                                                             |                |
|                                      |                 |                                                                                            |                       | 25-29.9      | 45  |                 |                                                                      |                                                                                                                                                                                                                                                                                                                                                                   |                                                                                                             |                |
|                                      |                 |                                                                                            |                       | ≥30          | 37  |                 |                                                                      |                                                                                                                                                                                                                                                                                                                                                                   |                                                                                                             |                |
|                                      |                 |                                                                                            |                       | Not reported | 12  |                 |                                                                      |                                                                                                                                                                                                                                                                                                                                                                   |                                                                                                             |                |

| Author<br>(year),<br>Study<br>country | Design              | Aim(s)                                                                                         | Sample                             | BMI | N  | Age of<br>Children  | FPP<br>Measures   | Relevant FPP Findings                                                                                                                                                                                                                                                                                                                                                                                                                                                                                                | Relevant Conclusions                                                                                                 | Quality<br>Rating |
|---------------------------------------|---------------------|------------------------------------------------------------------------------------------------|------------------------------------|-----|----|---------------------|-------------------|----------------------------------------------------------------------------------------------------------------------------------------------------------------------------------------------------------------------------------------------------------------------------------------------------------------------------------------------------------------------------------------------------------------------------------------------------------------------------------------------------------------------|----------------------------------------------------------------------------------------------------------------------|-------------------|
| Costa et al<br>(2011) [72],<br>Brazil | Cross-<br>sectional | To examine<br>parents feeding<br>attitudes, parent<br>BMI, and<br>children's<br>weight status. | 105<br>Parents/<br>Care-<br>givers | <25 | 68 | 6 – 10<br>year olds | Portuguese<br>CFQ | Significant differences in<br>perceived parent weight<br>( $p = .001$ ), concern about<br>child weight ( $p = .006$ ),<br>and restriction ( $p = .023$ )<br>between parents with<br>healthy-weight vs parents<br>with overweight/obesity.<br>No significant differences<br>in perceived<br>responsibility ( $p = .861$ ),<br>perceived child weight ( $p = .844$ ),<br>pressure to eat ( $p = .233$ ) and<br>monitoring ( $p = .21$ ) between<br>parents with healthy-weight and<br>parents with overweight/obesity. | Perceptions and attitudes<br>of parents may independently<br>be associated with overweight<br>in children aged 6-10. | –                 |
|                                       |                     |                                                                                                |                                    | >25 | 37 |                     |                   |                                                                                                                                                                                                                                                                                                                                                                                                                                                                                                                      |                                                                                                                      |                   |

| Author (year), Study country   | Design          | Aim(s)                                                                                       | Sample      | BMI       | N   | Age of Children | FPP Measures                                                                                        | Relevant FPP Findings                                                                                                                                                                                                                                                                                                                                                                                                                                 | Relevant Conclusions                                               | Quality Rating |
|--------------------------------|-----------------|----------------------------------------------------------------------------------------------|-------------|-----------|-----|-----------------|-----------------------------------------------------------------------------------------------------|-------------------------------------------------------------------------------------------------------------------------------------------------------------------------------------------------------------------------------------------------------------------------------------------------------------------------------------------------------------------------------------------------------------------------------------------------------|--------------------------------------------------------------------|----------------|
| Francis et al (2001) [68], USA | Cross-sectional | To explore the predictors of the use of maternal restriction and pressure feeding practices. | 196 mothers | <25       | 92  | 5 year olds     | CFQ subscales: Perceived child overweight , Child overweight , and Restriction, and Pressure to Eat | There were no significant differences in the level of CFQ restriction and CFQ pressure to eat between mothers with healthy-weight and mothers with overweight. Among mothers with overweight, the use of restriction was significantly predicted by concern for daughters' weight ( $p \leq .05$ ); pressure to eat was significantly predicted by daughters' adiposity ( $p \leq .05$ ) and mothers' concern for daughters' weight ( $p \leq .05$ ). | Maternal weight status does not influence child-feeding practices. | +              |
|                                |                 |                                                                                              |             | $\geq 25$ | 104 |                 |                                                                                                     |                                                                                                                                                                                                                                                                                                                                                                                                                                                       |                                                                    |                |

| Author<br>(year),<br>Study<br>country  | Design       | Aim(s)                                                                                                                                                                                                           | Sample      | BMI   | N  | Age of<br>Children | FPP<br>Measures           | Relevant FPP Findings                                                                                                                     | Relevant Conclusions                                                                    | Quality<br>Rating |
|----------------------------------------|--------------|------------------------------------------------------------------------------------------------------------------------------------------------------------------------------------------------------------------|-------------|-------|----|--------------------|---------------------------|-------------------------------------------------------------------------------------------------------------------------------------------|-----------------------------------------------------------------------------------------|-------------------|
| Francis &<br>Birch (2005)<br>[83], USA | Longitudinal | To explore the influence of maternal restriction on daughter's food intake, the influence of daughters' eating in the absence of hunger on BMI, and maternal weight status as a mediator on these relationships. | 171 mothers | ≤24.9 | 80 | 5 – 9 year olds    | CFQ subscale: Restriction | Overall, there was no significant difference in the amount of restriction used by mothers with overweight vs mothers with healthy weight. | There is no specific feeding style associated with mothers with overweight and obesity. | +                 |
|                                        |              |                                                                                                                                                                                                                  |             | ≥25   | 91 |                    |                           |                                                                                                                                           |                                                                                         |                   |

| Author (year), Study country                | Design          | Aim(s)                                                   | Sample      | BMI       | N   | Age of Children | FPP Measures | Relevant FPP Findings                                                                                                                                                                                                                                                                                                                                                                                                                                                                                                                   | Relevant Conclusions                                                                                                                     | Quality Rating |
|---------------------------------------------|-----------------|----------------------------------------------------------|-------------|-----------|-----|-----------------|--------------|-----------------------------------------------------------------------------------------------------------------------------------------------------------------------------------------------------------------------------------------------------------------------------------------------------------------------------------------------------------------------------------------------------------------------------------------------------------------------------------------------------------------------------------------|------------------------------------------------------------------------------------------------------------------------------------------|----------------|
| Haycraft, Karasouli & Meyer (2017) [73], UK | Cross-sectional | To compare maternal feeding practices by maternal weight | 437 mothers | 19-24.9   | 249 | 2 – 6 year olds | CFPQ         | Significantly higher reports of child control ( $p < .001$ ) and lower reports of encouraging balance and variety ( $p = .029$ ), environment ( $p = .021$ ) and modelling ( $p < .001$ ) among mothers with overweight/obesity vs mothers with healthy-weight. There were no significant differences between mothers with healthy-weight/overweight and obesity on any other CFPQ subscales (involvement, monitoring, pressure to eat, restriction for health, restrictions for weight control, food as a reward, emotion regulation). | Mothers with overweight and obesity engage in fewer healthy child feeding practices when compared to a healthy weight sample of mothers. | +              |
|                                             |                 |                                                          |             | $\geq 25$ | 188 |                 |              |                                                                                                                                                                                                                                                                                                                                                                                                                                                                                                                                         |                                                                                                                                          |                |

| Author (year), Study country       | Design          | Aim(s)                                                                                                                                                        | Sample      | BMI | N   | Age of Children | FPP Measures                                                                                                                          | Relevant FPP Findings                                                                                                                                                                                                                                                                                                                                                                                                                                           | Relevant Conclusions                                                                                                                                                  | Quality Rating |
|------------------------------------|-----------------|---------------------------------------------------------------------------------------------------------------------------------------------------------------|-------------|-----|-----|-----------------|---------------------------------------------------------------------------------------------------------------------------------------|-----------------------------------------------------------------------------------------------------------------------------------------------------------------------------------------------------------------------------------------------------------------------------------------------------------------------------------------------------------------------------------------------------------------------------------------------------------------|-----------------------------------------------------------------------------------------------------------------------------------------------------------------------|----------------|
| Jingxiong et al (2008) [78], China | Cross-sectional | To examine the prevalence of overweight among infants and children in Beijing, and the relationship with child-feeding practices and parental characteristics | 430 mothers | ≤24 | 323 | 1 – 3 year olds | An interview to obtain information on: parent education level, family income, and feeding practices (including a 24-h dietary recall) | In comparison to mothers with healthy-weight, mothers with overweight/obesity worry significantly more about their child overeating ( $p = .004$ ) that their child would develop obesity ( $p = .003$ ). Significantly more mothers with overweight/obesity controlled feeding with a regular schedule in comparison to healthy-weight mothers ( $p = .017$ ) and used food to soothe the child significantly less than healthy-weight mothers ( $p = .008$ ). | Mothers with overweight report controlling child feeding with a regular feeding schedule and soothed children using food less often than mothers with healthy-weight. | +              |
|                                    |                 |                                                                                                                                                               |             | ≥24 | 107 |                 |                                                                                                                                       |                                                                                                                                                                                                                                                                                                                                                                                                                                                                 |                                                                                                                                                                       |                |

| Author (year), Study country                | Design          | Aim(s)                                                                                                                                                                                            | Sample      | BMI   | N   | Age of Children | FPP Measures                                                                                    | Relevant FPP Findings                                                                                                                                                                                                                                            | Relevant Conclusions                                                   | Quality Rating |
|---------------------------------------------|-----------------|---------------------------------------------------------------------------------------------------------------------------------------------------------------------------------------------------|-------------|-------|-----|-----------------|-------------------------------------------------------------------------------------------------|------------------------------------------------------------------------------------------------------------------------------------------------------------------------------------------------------------------------------------------------------------------|------------------------------------------------------------------------|----------------|
| Kröller & Warschburger (2008) [74], Germany | Cross-sectional | To explore the impact of various child-feeding practices on a child's food intake and the influence of socio-economic status and weight on the use of different types of child-feeding practices. | 219 mothers | ≤24.9 | 104 | 3 – 6 year olds | Items from the CFQ, CFSQ and newly developed questions from interviews with mothers and experts | No significant differences in child feeding practices between mothers with healthy weight and overweight/obesity. Maternal weight (underweight/healthy weight/overweight/obesity) had no significant effect on the use of child feeding practices ( $p = .60$ ). | Maternal weight does not influence the use of child feeding practices. | +              |
|                                             |                 |                                                                                                                                                                                                   |             | ≥25   | 111 |                 |                                                                                                 |                                                                                                                                                                                                                                                                  |                                                                        |                |

| Author<br>(year),<br>Study<br>country     | Design                    | Aim(s)                                                                                                                          | Sample        | BMI | N  | Age of<br>Children | FPP<br>Measures                                                            | Relevant FPP Findings                                                                                                                                                                                                                                                                                                                                                                                                                                                                                                                                 | Relevant Conclusions                                                    | Quality<br>Rating |
|-------------------------------------------|---------------------------|---------------------------------------------------------------------------------------------------------------------------------|---------------|-----|----|--------------------|----------------------------------------------------------------------------|-------------------------------------------------------------------------------------------------------------------------------------------------------------------------------------------------------------------------------------------------------------------------------------------------------------------------------------------------------------------------------------------------------------------------------------------------------------------------------------------------------------------------------------------------------|-------------------------------------------------------------------------|-------------------|
| Lewis &<br>Worobey<br>(2011) [80],<br>USA | Laboratory<br>observation | To explore<br>maternal control<br>and whether<br>feeding style is<br>different<br>between healthy<br>and overweight<br>mothers. | 20<br>mothers | <25 | 10 | 2 year<br>olds     | CFQ, food<br>record,<br>observed<br>behaviours<br>and video<br>recordings. | No significant differences<br>in pressure ( $p = .56$ ) and<br>restriction ( $p = .28$ ),<br>observed feeding style<br>pressure ( $p = .49$ ), and<br>observed feeding style<br>restriction ( $p = .28$ )<br>between mothers with<br>healthy weight and<br>mothers with<br>overweight/obesity.<br>Mothers with<br>overweight/obesity<br>demonstrated<br>significantly more concern<br>about their own weight ( $p = .05$ ) than mothers with<br>healthy weight.<br>Maternal BMI was not<br>correlated with reported<br>or observed feeding<br>styles. | Lack of association<br>between reported and<br>observed feeding styles. | –                 |
|                                           |                           |                                                                                                                                 |               | ≥25 | 10 |                    |                                                                            |                                                                                                                                                                                                                                                                                                                                                                                                                                                                                                                                                       |                                                                         |                   |

| Author (year), Study country       | Design                 | Aim(s)                                                                                                                                                           | Sample                   | BMI       | N                          | Age of Children | FPP Measures                            | Relevant FPP Findings                                                                                                                                                                                                                                                                                                                                                                                    | Relevant Conclusions                                                                                                                              | Quality Rating |
|------------------------------------|------------------------|------------------------------------------------------------------------------------------------------------------------------------------------------------------|--------------------------|-----------|----------------------------|-----------------|-----------------------------------------|----------------------------------------------------------------------------------------------------------------------------------------------------------------------------------------------------------------------------------------------------------------------------------------------------------------------------------------------------------------------------------------------------------|---------------------------------------------------------------------------------------------------------------------------------------------------|----------------|
| Lipowska et al (2018) [65], Poland | Cross-sectional        | To explore nutritional knowledge, eating habits, and appetite traits among children with and without excess body fat in the context of FPPs and body-fat status. | 315 mothers; 276 fathers | Healthy * | 190 Mothers<br>109 Fathers | 5 year olds     | PFSQ                                    | Mothers with healthy body fat use encouragement to eat significantly less than mothers with an overfat body status ( $p < .05$ ). Fathers with healthy body fat use control over eating significantly more than fathers with an overfat body status ( $p < .05$ ). There were no significant findings on food as a reward and emotional feeding and parental body fat status ( $p$ values not reported). | Mothers with an overfat body status do not necessarily transmit unhealthy eating behaviours to their children.                                    | +              |
|                                    |                        |                                                                                                                                                                  |                          | Overfat*  | 125 Mothers<br>167 Fathers |                 |                                         |                                                                                                                                                                                                                                                                                                                                                                                                          |                                                                                                                                                   |                |
| Lumeng & Burke (2006) [81], USA    | Laboratory observation | To explore if there is an association between maternal prompting to eat, child compliance and mother and child weight status.                                    | 71 mothers               | <30       | 45                         | 3 – 6 year olds | Parental prompting and child compliance | There was no significant difference found in prompting child to eat ( $p = .55$ ) between mothers with and without obesity.                                                                                                                                                                                                                                                                              | Greater maternal prompting was predicted by a younger child age, a novel food, more bites of food taken by the mother and low maternal education. | –              |
|                                    |                        |                                                                                                                                                                  |                          | ≥30       | 26                         |                 |                                         |                                                                                                                                                                                                                                                                                                                                                                                                          |                                                                                                                                                   |                |

| Author (year), Study country                   | Design          | Aim(s)                                                                                                 | Sample      | BMI               | N   | Age of Children   | FPP Measures                                                                                    | Relevant FPP Findings                                                                                                                                                                                                                                                                                                | Relevant Conclusions                                                                                             | Quality Rating |
|------------------------------------------------|-----------------|--------------------------------------------------------------------------------------------------------|-------------|-------------------|-----|-------------------|-------------------------------------------------------------------------------------------------|----------------------------------------------------------------------------------------------------------------------------------------------------------------------------------------------------------------------------------------------------------------------------------------------------------------------|------------------------------------------------------------------------------------------------------------------|----------------|
| Powers et al (2006) [75], USA                  | Cross-sectional | To explore the association of maternal feeding practices with maternal BMI and child eating behaviours | 290 mothers | <24.9             | 77  | 2 – 4.9 year olds | CFQ subscales: Restriction and Pressure to eat, PFSQ subscale: Control                          | There were no significant differences found with between maternal BMI and maternal feeding practices, restriction ( $p = .63$ ), pressure to eat ( $p = .33$ ) and control ( $p = .62$ ).                                                                                                                            | There is no particular feeding style shared among mothers with overweight or obesity.                            | +              |
|                                                |                 |                                                                                                        |             | 25-29.9           | 86  |                   |                                                                                                 |                                                                                                                                                                                                                                                                                                                      |                                                                                                                  |                |
|                                                |                 |                                                                                                        |             | 30-39.9           | 97  |                   |                                                                                                 |                                                                                                                                                                                                                                                                                                                      |                                                                                                                  |                |
|                                                |                 |                                                                                                        |             | ≥40.0             | 30  |                   |                                                                                                 |                                                                                                                                                                                                                                                                                                                      |                                                                                                                  |                |
| Raaijmakers et al (2014) [76], The Netherlands | Cross-sectional | To explore the use of instrumental and emotional feeding practices between main meals                  | 359 mothers | ≤18.49            | 11  | 4 – 12 year olds  | Self-constructed instrument developed from interviews with mothers and health promotion experts | Using food as a reward (26.8% of mothers with obesity) was reported more than use of food as a punishment (18.3% of mothers with obesity) and as a comfort (16.9% of mothers with obesity) with their child. No significant association between emotional and instrumental child feeding practices and maternal BMI. | Mothers offered energy dense and nutrient poor food items in emotional and instrumental child feeding practices. | +              |
|                                                |                 |                                                                                                        |             | 18.5-24.9         | 175 |                   |                                                                                                 |                                                                                                                                                                                                                                                                                                                      |                                                                                                                  |                |
|                                                |                 |                                                                                                        |             | 25-29.9           | 101 |                   |                                                                                                 |                                                                                                                                                                                                                                                                                                                      |                                                                                                                  |                |
|                                                |                 |                                                                                                        |             | ≥30               | 71  |                   |                                                                                                 |                                                                                                                                                                                                                                                                                                                      |                                                                                                                  |                |
|                                                |                 |                                                                                                        |             | Over-weight (≥25) | 5   |                   |                                                                                                 |                                                                                                                                                                                                                                                                                                                      |                                                                                                                  |                |
|                                                |                 |                                                                                                        |             | Obese             | 10  |                   |                                                                                                 |                                                                                                                                                                                                                                                                                                                      |                                                                                                                  |                |

| Author (year), Study country                         | Design          | Aim(s)                                                                                   | Sample                   | BMI       | N   | Age of Children     | FPP Measures                                   | Relevant FPP Findings                                                                                                                                                                                                                                                                                                                                                                                                                    | Relevant Conclusions                                                                                                                 | Quality Rating |
|------------------------------------------------------|-----------------|------------------------------------------------------------------------------------------|--------------------------|-----------|-----|---------------------|------------------------------------------------|------------------------------------------------------------------------------------------------------------------------------------------------------------------------------------------------------------------------------------------------------------------------------------------------------------------------------------------------------------------------------------------------------------------------------------------|--------------------------------------------------------------------------------------------------------------------------------------|----------------|
| Roberts, Goodman & Musher-Eizenmann (2018) [69], USA | Cross-sectional | To investigate socioeconomic status, parental BMI and dieting status on the use of FPPs. | 376 mothers; 118 fathers | 18.5-24.9 | 223 | 2.5 – 7.5 year olds | CFPQ, FSQ, MioH, and newly developed questions | Post-hoc analysis revealed that in comparison to parents with healthy-weight and overweight, parents with obesity use significantly less structure FPPs. There was no difference between parents with healthy-weight and overweight. There was no significant post-hoc differences between parents with healthy-weight, overweight, and obesity and autonomy promotion (irrespective of a significant main effect) and coercive control. | When compared to other parental characteristics such as parental BMI, socioeconomic status has a small influence on the use of FPPs. | ++             |
|                                                      |                 |                                                                                          |                          | 25-29.9   | 149 |                     |                                                |                                                                                                                                                                                                                                                                                                                                                                                                                                          |                                                                                                                                      |                |
|                                                      |                 |                                                                                          |                          | ≥30       | 120 |                     |                                                |                                                                                                                                                                                                                                                                                                                                                                                                                                          |                                                                                                                                      |                |

| Author (year), Study country                       | Design                                    | Aim(s)                                                                                                                              | Sample                                                | BMI                          | N   | Age of Children | FPP Measures | Relevant FPP Findings                                                                                                                                                                                                                                                                                                                                                                                                                                                                                                   | Relevant Conclusions                                                                                                                                                 | Quality Rating |
|----------------------------------------------------|-------------------------------------------|-------------------------------------------------------------------------------------------------------------------------------------|-------------------------------------------------------|------------------------------|-----|-----------------|--------------|-------------------------------------------------------------------------------------------------------------------------------------------------------------------------------------------------------------------------------------------------------------------------------------------------------------------------------------------------------------------------------------------------------------------------------------------------------------------------------------------------------------------------|----------------------------------------------------------------------------------------------------------------------------------------------------------------------|----------------|
| Russell et al (2018) [85], Australia & New Zealand | Cross-sectional (secondary data analysis) | To explore FPPs among parents of toddlers and pre-schoolers and to examine the how FPPs differ by parent and child demographic data | 751 mothers                                           | ≤ 25                         | 383 | 4 – 6 year olds | CFPQ         | Among pre-schoolers (and adjusted for receiving a nutrition intervention before the measurement of FPPs), the odds of mothers with obesity using CFPQ food as a reward and CFPQ child control were higher compared to mothers with healthy-weight (OR = 1.13, 95% CI 0.94, 1.36; OR = 1.22, 95% CI 0.71, 2.09). The odds of mothers with obesity using CFPQ restriction for health and pressure to eat were lower compared to mothers with healthy-weight (OR = 0.86, 95% CI 0.72, 1.02; OR = 0.82, 95% CI 0.73, 0.91). | Nutrition interventions are unlikely to detect change in targeted FPPs since parents already report best practices such as modelling and a healthy food environment. | +              |
|                                                    |                                           |                                                                                                                                     |                                                       | 25 ≤ 30                      | 186 |                 |              |                                                                                                                                                                                                                                                                                                                                                                                                                                                                                                                         |                                                                                                                                                                      |                |
|                                                    |                                           |                                                                                                                                     |                                                       | ≥ 30                         | 152 |                 |              |                                                                                                                                                                                                                                                                                                                                                                                                                                                                                                                         |                                                                                                                                                                      |                |
|                                                    |                                           |                                                                                                                                     |                                                       | Not reported                 | 30  |                 |              |                                                                                                                                                                                                                                                                                                                                                                                                                                                                                                                         |                                                                                                                                                                      |                |
| Wardle et al (2002) [77], UK                       | Cross-sectional                           | To identify any differences in feeding styles among mothers with obesity and normal weight                                          | Families with healthy-weight, over-weight and obesity | ≤25                          | 114 | 4 – 5 year olds | PFSQ         | Mothers with obesity reported significantly less control over their children's eating (p = .01) than mothers with healthy-weight. There were no significant differences in reports of emotional feeding, instrumental feeding and prompting/encouragement to eat.                                                                                                                                                                                                                                                       | No difference in use of emotional, instrumental, and prompting/encouragement to eat parental feeding styles among mothers with healthy-weight and obesity.           | +              |
|                                                    |                                           |                                                                                                                                     |                                                       | Mothers ≥28.5<br>Fathers ≥25 | 100 |                 |              |                                                                                                                                                                                                                                                                                                                                                                                                                                                                                                                         |                                                                                                                                                                      |                |

| Author<br>(year),<br>Study<br>country  | Design                    | Aim(s)                                                                                                                                                                            | Sample                            | BMI                  | N  | Age of<br>Children             | FPP<br>Measures                        | Relevant FPP Findings                                                                                                                                                                                                                                                                                                                                                                                                                                                                                                                                                      | Relevant Conclusions                                                                                                                                                                                         | Quality<br>Rating |
|----------------------------------------|---------------------------|-----------------------------------------------------------------------------------------------------------------------------------------------------------------------------------|-----------------------------------|----------------------|----|--------------------------------|----------------------------------------|----------------------------------------------------------------------------------------------------------------------------------------------------------------------------------------------------------------------------------------------------------------------------------------------------------------------------------------------------------------------------------------------------------------------------------------------------------------------------------------------------------------------------------------------------------------------------|--------------------------------------------------------------------------------------------------------------------------------------------------------------------------------------------------------------|-------------------|
| Wendt et al<br>(2015) [82],<br>Germany | Laboratory<br>observation | To explore<br>parent-child<br>interactions<br>during feeding<br>or joint eating<br>and investigate<br>the differences<br>between<br>mothers and<br>fathers and<br>parental weight | 148<br>mothers;<br>148<br>fathers | ≤18.5<br>Mothers     | 4  | 7 months<br>– 3.9 year<br>olds | Observations rated<br>using the<br>CFS | No significant differences<br>found in CFS subscales<br>dyadic reciprocity, dyadic<br>conflict, talk/distraction,<br>struggle for control, and<br>non-contingency among<br>mothers with healthy-<br>weight, overweight and<br>obesity. There were also<br>no significant differences<br>found among fathers with<br>healthy-weight,<br>overweight and obesity<br>apart from struggle for<br>control. Fathers with<br>overweight demonstrated<br>a significantly higher<br>amount of struggle for<br>control than fathers with<br>healthy-weight and<br>obesity (p = .003). | Parents with healthy-<br>weight, overweight, and<br>obesity parents show the<br>same ability to show<br>relatedness, interpret<br>child cues and affective<br>engagement during<br>feeding and joint eating. | +                 |
|                                        |                           |                                                                                                                                                                                   |                                   | 18.5-24.9<br>Mothers | 83 |                                |                                        |                                                                                                                                                                                                                                                                                                                                                                                                                                                                                                                                                                            |                                                                                                                                                                                                              |                   |
|                                        |                           |                                                                                                                                                                                   |                                   | 25-29.9<br>Mothers   | 17 |                                |                                        |                                                                                                                                                                                                                                                                                                                                                                                                                                                                                                                                                                            |                                                                                                                                                                                                              |                   |
|                                        |                           |                                                                                                                                                                                   |                                   | ≥30<br>Mothers       | 44 |                                |                                        |                                                                                                                                                                                                                                                                                                                                                                                                                                                                                                                                                                            |                                                                                                                                                                                                              |                   |
|                                        |                           |                                                                                                                                                                                   |                                   | Fathers              | 77 |                                |                                        |                                                                                                                                                                                                                                                                                                                                                                                                                                                                                                                                                                            |                                                                                                                                                                                                              |                   |
|                                        |                           |                                                                                                                                                                                   |                                   | Fathers              | 32 |                                |                                        |                                                                                                                                                                                                                                                                                                                                                                                                                                                                                                                                                                            |                                                                                                                                                                                                              |                   |
|                                        |                           |                                                                                                                                                                                   |                                   | Fathers              | 37 |                                |                                        |                                                                                                                                                                                                                                                                                                                                                                                                                                                                                                                                                                            |                                                                                                                                                                                                              |                   |

| Author (year), Study country    | Design          | Aim(s)                                                                                                 | Sample      | BMI  | N  | Age of Children  | FPP Measures | Relevant FPP Findings                                                                                                                                                                                                                                                                                                                                                                 | Relevant Conclusions                                                     | Quality Rating |
|---------------------------------|-----------------|--------------------------------------------------------------------------------------------------------|-------------|------|----|------------------|--------------|---------------------------------------------------------------------------------------------------------------------------------------------------------------------------------------------------------------------------------------------------------------------------------------------------------------------------------------------------------------------------------------|--------------------------------------------------------------------------|----------------|
| Williams et al (2017) [87], USA | Cross-sectional | To explore parental BMI and family behaviours associated with childhood obesity in a community sample. | 143 parents | ≤ 25 | 70 | 9 – 10 year olds | PSEAS        | Underweight and healthy-weight parents monitor their child's diet significantly more than parents with overweight and obesity ( $p < .000$ ). There were no significant differences among parents' BMI and discipline (children are disciplined for unhealthy eating), control, limit setting (boundaries with unhealthy eating) and reinforcement (praise for eating healthy foods). | Lower parental BMI is associated with a healthier home food environment. | +              |
|                                 |                 |                                                                                                        |             | ≥ 25 | 73 |                  |              |                                                                                                                                                                                                                                                                                                                                                                                       |                                                                          |                |

\*Determined using a Segmental Body Composition Monitor. Parental body fat percentage was calculated individually due to the differences in age.

PFQ: Pre-schooler Feeding Questionnaire, CFQ: Child Feeding Questionnaire, CFS: Chatoor Feeding Scale, PFSQ: Parental Feeding Style Questionnaire, TSFFQ: Toddler Snack Food Feeding Questionnaire, CFPQ: Comprehensive Feeding Practices Questionnaire, CFSQ: Caregiver's Feeding Styles Questionnaire, PSEAS: Parenting Strategies for Eating and Activity Scale , MioH: Meals in our Household
